# Supplementary material for: The Effects and Mechanisms of Sennoside A on Inducing Cytotoxicity, Apoptosis, and Inhibiting Metastasis in Human Chondrosarcoma Cells
Source: Hindawi journal article supplement (doi:10.1155/2022/8063497), 2022-08-31
Supplement: f1 [file 8063497.f1.pdf]

## Supplementary Materials

Supplement Table 1. The predicted targets of Sennoside A (SA).

| SYMBOL   | ENTREZID | ENSEMBL         | REFSEQ       |
|----------|----------|-----------------|--------------|
| CA12     | 771      | ENSG00000074410 | NM_001218    |
| EEA1     | 8411     | ENSG00000102189 | NM_003566    |
| CASP3    | 836      | ENSG00000164305 | NM_001354777 |
| BMP2     | 650      | ENSG00000125845 | NM_001200    |
| TTR      | 7276     | ENSG00000118271 | NM_000371    |
| CDK2     | 1017     | ENSG00000123374 | NM_001290230 |
| GSTP1    | 2950     | ENSG00000084207 | NM_000852    |
| MAPK10   | 5602     | ENSG00000109339 | NM_001318067 |
| CMA1     | 1215     | ENSG00000092009 | NM_001308083 |
| PDE4B    | 5142     | ENSG00000184588 | NM_001037339 |
| FAP      | 2191     | ENSG00000078098 | NM_001291807 |
| PPIA     | 5478     | ENSG00000196262 | NM_001300981 |
| GBA      | 2629     | ENSG00000177628 | NM_000157    |
| GBA      | 2629     | ENSG00000262446 | NM_000157    |
| HSD17B11 | 51170    | ENSG00000198189 | NM_016245    |
| PTPN1    | 5770     | ENSG00000196396 | NM_001278618 |
| CTSD     | 1509     | ENSG00000117984 | NM_001909    |
| BCHE     | 590      | ENSG00000114200 | NM_000055    |
| PNP      | 4860     | ENSG00000198805 | NM_000270    |
| KDR      | 3791     | ENSG00000128052 | NM_002253    |
| ICAM2    | 3384     | ENSG00000108622 | NM_000873    |
| TGFBR2   | 7048     | ENSG00000163513 | NM_001024847 |
| RTN4R    | 65078    | ENSG00000040608 | NM_023004    |
| FCAR     | 2204     | ENSG00000186431 | NM_002000    |
| FCAR     | 2204     | ENSG00000275269 | NM_002000    |
| FCAR     | 2204     | ENSG00000273738 | NM_002000    |
| FCAR     | 2204     | ENSG00000276985 | NM_002000    |
| FCAR     | 2204     | ENSG00000276858 | NM_002000    |
| FCAR     | 2204     | ENSG00000275136 | NM_002000    |
| FCAR     | 2204     | ENSG00000275970 | NM_002000    |
| FCAR     | 2204     | ENSG00000278415 | NM_002000    |
| FCAR     | 2204     | ENSG00000275564 | NM_002000    |
| FCAR     | 2204     | ENSG00000274580 | NM_002000    |
| FCAR     | 2204     | ENSG00000283750 | NM_002000    |
| FCAR     | 2204     | ENSG00000283953 | NM_002000    |
| FCAR     | 2204     | ENSG00000284061 | NM_002000    |
| FCAR     | 2204     | ENSG00000284004 | NM_002000    |
| FCAR     | 2204     | ENSG00000284245 | NM_002000    |

|         |       |                 |              |
|---------|-------|-----------------|--------------|
| PIM1    | 5292  | ENSG00000137193 | NM_001243186 |
| AKR1B1  | 231   | ENSG00000085662 | NM_001346142 |
| FKBP1A  | 2280  | ENSG00000088832 | NM_000801    |
| PGR     | 5241  | ENSG00000082175 | NM_000926    |
| METAP1  | 23173 | ENSG00000164024 | NM_015143    |
| GSR     | 2936  | ENSG00000104687 | NM_000637    |
| CHIT1   | 1118  | ENSG00000133063 | NM_001256125 |
| CLPP    | 8192  | ENSG00000125656 | NM_006012    |
| HSPA8   | 3312  | ENSG00000109971 | NM_006597    |
| LGALS7  | 3963  | ENSG00000205076 | NM_002307    |
| LGALS7  | 3963  | ENSG00000282902 | NM_002307    |
| LGALS7  | 3963  | ENSG00000283082 | NM_002307    |
| LGALS7  | 3963  | ENSG00000178934 | NM_002307    |
| CA2     | 760   | ENSG00000104267 | NM_000067    |
| PKLR    | 5313  | ENSG00000143627 | NM_000298    |
| PKLR    | 5313  | ENSG00000262785 | NM_000298    |
| ALB     | 213   | ENSG00000163631 | NM_000477    |
| APOA2   | 336   | ENSG00000158874 | NM_001643    |
| AKR1C2  | 1646  | ENSG00000151632 | NM_001135241 |
| BACE1   | 23621 | ENSG00000186318 | NM_001207048 |
| CTSV    | 1515  | ENSG00000136943 | NM_001201575 |
| EPHB4   | 2050  | ENSG00000196411 | NM_004444    |
| CA1     | 759   | ENSG00000133742 | NM_001128829 |
| ESR1    | 2099  | ENSG00000091831 | NM_000125    |
| CASP7   | 840   | ENSG00000165806 | NM_001227    |
| NR1H2   | 7376  | ENSG00000131408 | NM_001256647 |
| HCK     | 3055  | ENSG00000101336 | NM_001172129 |
| IMPA1   | 3612  | ENSG00000133731 | NM_001144878 |
| TREM1   | 54210 | ENSG00000124731 | NM_001242589 |
| CSNK2A1 | 1457  | ENSG00000101266 | NM_001362770 |
| RNASE4  | 6038  | ENSG00000258818 | NM_001282192 |
| THRB    | 7068  | ENSG00000151090 | NM_000461    |
| PLAU    | 5328  | ENSG00000122861 | NM_001145031 |
| IGF1R   | 3480  | ENSG00000140443 | NM_000875    |
| LDHB    | 3945  | ENSG00000111716 | NM_001174097 |
| SRC     | 6714  | ENSG00000197122 | NM_005417    |
| MAPK1   | 5594  | ENSG00000100030 | NM_002745    |
| PSPH    | 5723  | ENSG00000146733 | NM_001370503 |
| ANG     | 283   | ENSG00000214274 | NM_001097577 |
| DHFR    | 1719  | ENSG00000228716 | NM_000791    |
| CPB1    | 1360  | ENSG00000153002 | NM_001871    |
| CCNA2   | 890   | ENSG00000145386 | NM_001237    |
| ME2     | 4200  | ENSG00000082212 | NM_001168335 |
| SHBG    | 6462  | ENSG00000129214 | NM_001040    |

|          |        |                 |              |
|----------|--------|-----------------|--------------|
| MMP8     | 4317   | ENSG00000118113 | NM_001304441 |
| CHEK1    | 1111   | ENSG00000149554 | NM_001114121 |
| SULT2A1  | 6822   | ENSG00000105398 | NM_003167    |
| F2       | 2147   | ENSG00000180210 | NM_000506    |
| PNPO     | 55163  | ENSG00000108439 | NM_018129    |
| MMP3     | 4314   | ENSG00000149968 | NM_002422    |
| GC       | 2638   | ENSG00000145321 | NM_000583    |
| BMP7     | 655    | ENSG00000101144 | NM_001719    |
| MTAP     | 4507   | ENSG00000099810 | NM_002451    |
| APCS     | 325    | ENSG00000132703 | NM_001639    |
| CRAT     | 1384   | ENSG00000095321 | NM_000755    |
| MMP13    | 4322   | ENSG00000137745 | NM_002427    |
| CFD      | 1675   | ENSG00000197766 | NM_001317335 |
| CFD      | 1675   | ENSG00000274619 | NM_001317335 |
| EGFR     | 1956   | ENSG00000146648 | NM_001346897 |
| MAPK14   | 1432   | ENSG00000112062 | NM_001315    |
| CTSB     | 1508   | ENSG00000164733 | NM_001317237 |
| CTSB     | 1508   | ENSG00000285132 | NM_001317237 |
| AMY2A    | 279    | ENSG00000243480 | NM_000699    |
| BCAT2    | 587    | ENSG00000105552 | NM_001164773 |
| IGLV2-8  | 28817  | ENSG00000278196 | NA           |
| FABP4    | 2167   | ENSG00000170323 | NM_001442    |
| AZGP1    | 563    | ENSG00000160862 | NM_001185    |
| HSD17B1  | 3292   | ENSG00000108786 | NM_000413    |
| ADH1B    | 125    | ENSG00000196616 | NM_000668    |
| F10      | 2159   | ENSG00000126218 | NM_000504    |
| NOS3     | 4846   | ENSG00000164867 | NM_000603    |
| MAOB     | 4129   | ENSG00000069535 | NM_000898    |
| PDE4D    | 5144   | ENSG00000113448 | NM_001104631 |
| GALK1    | 2584   | ENSG00000108479 | NM_000154    |
| PPP5C    | 5536   | ENSG00000011485 | NM_001204284 |
| CFB      | 629    | ENSG00000243649 | NM_001710    |
| CFB      | 629    | ENSG00000242335 | NM_001710    |
| CFB      | 629    | ENSG00000204359 | NM_001710    |
| CFB      | 629    | ENSG00000243570 | NM_001710    |
| CFB      | 629    | ENSG00000241534 | NM_001710    |
| CFB      | 629    | ENSG00000239754 | NM_001710    |
| CFB      | 629    | ENSG00000241253 | NM_001710    |
| CSNK1G2  | 1455   | ENSG00000133275 | NM_001319    |
| PYGL     | 5836   | ENSG00000100504 | NM_001163940 |
| SORD     | 6652   | ENSG00000140263 | NM_003104    |
| NMNAT3   | 349565 | ENSG00000163864 | NM_001200047 |
| AHCY     | 191    | ENSG00000101444 | NM_000687    |
| HSP90AA1 | 3320   | ENSG00000080824 | NM_001017963 |

|          |       |                 |              |
|----------|-------|-----------------|--------------|
| REN      | 5972  | ENSG00000143839 | NM_000537    |
| HSD11B1  | 3290  | ENSG00000117594 | NM_001206741 |
| AKR1C3   | 8644  | ENSG00000196139 | NM_001253908 |
| KIF11    | 3832  | ENSG00000138160 | NM_004523    |
| KIF5B    | 3799  | ENSG00000170759 | NM_004521    |
| PAH      | 5053  | ENSG00000171759 | NM_000277    |
| PDE3B    | 5140  | ENSG00000152270 | NM_000922    |
| NCS1     | 23413 | ENSG00000107130 | NM_001128826 |
| PDPK1    | 5170  | ENSG00000140992 | NM_001261816 |
| OTC      | 5009  | ENSG00000036473 | NM_000531    |
| DHODH    | 1723  | ENSG00000102967 | NM_001025193 |
| ARF1     | 375   | ENSG00000143761 | NM_001024226 |
| C1S      | 716   | ENSG00000182326 | NM_001346850 |
| TGFBR1   | 7046  | ENSG00000106799 | NM_001130916 |
| NR3C2    | 4306  | ENSG00000151623 | NM_000901    |
| IMPDH2   | 3615  | ENSG00000178035 | NM_000884    |
| AKT1     | 207   | ENSG00000142208 | NM_001014431 |
| MMP12    | 4321  | ENSG00000262406 | NM_002426    |
| GALE     | 2582  | ENSG00000117308 | NM_000403    |
| FGF1     | 2246  | ENSG00000113578 | NM_000800    |
| TGM3     | 7053  | ENSG00000125780 | NM_003245    |
| EPHA2    | 1969  | ENSG00000142627 | NM_001329090 |
| PARP1    | 142   | ENSG00000143799 | NM_001618    |
| TPI1     | 7167  | ENSG00000111669 | NM_000365    |
| ANXA5    | 308   | ENSG00000164111 | NM_001154    |
| PLA2G2A  | 5320  | ENSG00000188257 | NM_000300    |
| TYMS     | 7298  | ENSG00000176890 | NM_001071    |
| PCK1     | 5105  | ENSG00000124253 | NM_002591    |
| DPP4     | 1803  | ENSG00000197635 | NM_001379604 |
| MAPKAPK2 | 9261  | ENSG00000162889 | NM_004759    |
| TGM2     | 7052  | ENSG00000198959 | NM_001323316 |
| CLIC1    | 1192  | ENSG00000213719 | NM_001287593 |
| CLIC1    | 1192  | ENSG00000223639 | NM_001287593 |
| CLIC1    | 1192  | ENSG00000226417 | NM_001287593 |
| CLIC1    | 1192  | ENSG00000226651 | NM_001287593 |
| CLIC1    | 1192  | ENSG00000226248 | NM_001287593 |
| CLIC1    | 1192  | ENSG00000230685 | NM_001287593 |
| CLIC1    | 1192  | ENSG00000206394 | NM_001287593 |
| PDE5A    | 8654  | ENSG00000138735 | NM_001083    |
| AR       | 367   | ENSG00000169083 | NM_000044    |
| RNASE3   | 6037  | ENSG00000169397 | NM_002935    |
| PLK1     | 5347  | ENSG00000166851 | NM_005030    |
| HMGCR    | 3156  | ENSG00000113161 | NM_000859    |
| LGALS2   | 3957  | ENSG00000100079 | NM_006498    |

|          |       |                 |              |
|----------|-------|-----------------|--------------|
| UCK2     | 7371  | ENSG00000143179 | NM_001363568 |
| ABO      | 28    | ENSG00000175164 | NM_020469    |
| ABO      | 28    | ENSG00000281879 | NM_020469    |
| SOD2     | 6648  | ENSG00000112096 | NM_000636    |
| CTSK     | 1513  | ENSG00000143387 | NM_000396    |
| RXRA     | 6256  | ENSG00000186350 | NM_001291920 |
| PDHB     | 5162  | ENSG00000168291 | NM_000925    |
| RHEB     | 6009  | ENSG00000106615 | NM_005614    |
| FHIT     | 2272  | ENSG00000189283 | NM_001166243 |
| LCK      | 3932  | ENSG00000182866 | NM_001042771 |
| GSK3B    | 2932  | ENSG00000082701 | NM_001146156 |
| BAG1     | 573   | ENSG00000107262 | NM_001172415 |
| B3GAT1   | 27087 | ENSG00000109956 | NM_001367973 |
| PPARG    | 5468  | ENSG00000132170 | NM_001330615 |
| ADH1C    | 126   | ENSG00000248144 | NM_000669    |
| MIF      | 4282  | ENSG00000240972 | NM_002415    |
| MIF      | 4282  | ENSG00000276701 | NM_002415    |
| INSR     | 3643  | ENSG00000171105 | NM_000208    |
| MTHFD1   | 4522  | ENSG00000100714 | NM_001364837 |
| DAPK1    | 1612  | ENSG00000196730 | NM_001288729 |
| ISG20    | 3669  | ENSG00000172183 | NM_001303233 |
| TYMP     | 1890  | ENSG00000025708 | NM_001113755 |
| AKR1C1   | 1645  | ENSG00000187134 | NM_001353    |
| F7       | 2155  | ENSG00000057593 | NM_000131    |
| MAPK8    | 5599  | ENSG00000107643 | NM_001278547 |
| BST1     | 683   | ENSG00000109743 | NM_004334    |
| SERPINA1 | 5265  | ENSG00000197249 | NM_000295    |
| SERPINA1 | 5265  | ENSG00000277377 | NM_000295    |
| MMP7     | 4316  | ENSG00000137673 | NM_002423    |
| ACP3     | 55    | ENSG00000014257 | NM_001099    |
| RAC2     | 5880  | ENSG00000128340 | NM_002872    |
| ITK      | 3702  | ENSG00000113263 | NM_005546    |
| YARS1    | 8565  | ENSG00000134684 | NM_003680    |
| DCK      | 1633  | ENSG00000156136 | NM_000788    |
| CDA      | 978   | ENSG00000158825 | NM_001785    |
| C1R      | 715   | ENSG00000159403 | NM_001354346 |
| C1R      | 715   | ENSG00000288512 | NM_001354346 |
| XIAP     | 331   | ENSG00000101966 | NM_001167    |
| FNTA     | 2339  | ENSG00000168522 | NM_001018676 |
| CALM1    | 801   | ENSG00000198668 | NM_001166106 |
| HDAC8    | 55869 | ENSG00000147099 | NM_001166418 |
| REG1A    | 5967  | ENSG00000115386 | NM_002909    |
| HK1      | 3098  | ENSG00000156515 | NM_000188    |
| ALDOA    | 226   | ENSG00000149925 | NM_000034    |

|         |        |                 |              |
|---------|--------|-----------------|--------------|
| FGFR2   | 2263   | ENSG00000066468 | NM_000141    |
| NQO2    | 4835   | ENSG00000124588 | NM_000904    |
| ATOX1   | 475    | ENSG00000177556 | NM_004045    |
| PAK6    | 56924  | ENSG00000137843 | NM_001276717 |
| CAT     | 847    | ENSG00000121691 | NM_001752    |
| CBR1    | 873    | ENSG00000159228 | NM_001286789 |
| DUSP6   | 1848   | ENSG00000139318 | NM_001946    |
| NQO1    | 1728   | ENSG00000181019 | NM_000903    |
| PRKACA  | 5566   | ENSG00000072062 | NM_001304349 |
| PRKACA  | 5566   | ENSG00000288516 | NM_001304349 |
| SELP    | 6403   | ENSG00000174175 | NM_003005    |
| TNK2    | 10188  | ENSG00000061938 | NM_001010938 |
| GPI     | 2821   | ENSG00000105220 | NM_000175    |
| GPI     | 2821   | ENSG00000282019 | NM_000175    |
| AMD1    | 262    | ENSG00000123505 | NM_001033059 |
| CES1    | 1066   | ENSG00000198848 | NM_001025194 |
| CES1    | 1066   | ENSG00000262243 | NM_001025194 |
| MET     | 4233   | ENSG00000105976 | NM_000245    |
| FGFR1   | 2260   | ENSG00000077782 | NM_001174063 |
| ALDH2   | 217    | ENSG00000111275 | NM_000690    |
| GSTA1   | 2938   | ENSG00000243955 | NM_001319059 |
| SYK     | 6850   | ENSG00000165025 | NM_001135052 |
| CDK7    | 1022   | ENSG00000134058 | NM_001324069 |
| CDK7    | 1022   | ENSG00000277273 | NM_001324069 |
| RAB11A  | 8766   | ENSG00000103769 | NM_001206836 |
| GLRX    | 2745   | ENSG00000173221 | NM_001118890 |
| PIK3CG  | 5294   | ENSG00000105851 | NM_001282426 |
| KIT     | 3815   | ENSG00000157404 | NM_000222    |
| TTPA    | 7274   | ENSG00000137561 | NM_000370    |
| PLEKHA4 | 57664  | ENSG00000105559 | NM_001161354 |
| PLA2G10 | 8399   | ENSG00000069764 | NM_003561    |
| PLA2G10 | 8399   | ENSG00000276870 | NM_003561    |
| DTYMK   | 1841   | ENSG00000168393 | NM_001165031 |
| MAN1B1  | 11253  | ENSG00000177239 | NM_016219    |
| ARSA    | 410    | ENSG00000100299 | NM_000487    |
| GSTT2B  | 653689 | ENSG00000133433 | NM_001080843 |
| GSTT2B  | 653689 | ENSG00000278695 | NM_001080843 |
| IMPDH1  | 3614   | ENSG00000106348 | NM_000883    |
| CTSF    | 8722   | ENSG00000174080 | NM_003793    |
| CDK6    | 1021   | ENSG00000105810 | NM_001145306 |
| CYP2C9  | 1559   | ENSG00000138109 | NM_000771    |
| ADH5    | 128    | ENSG00000197894 | NM_000671    |
| ADK     | 132    | ENSG00000156110 | NM_001123    |
| PAPSS1  | 9061   | ENSG00000138801 | NM_005443    |

|         |       |                 |              |
|---------|-------|-----------------|--------------|
| JAK2    | 3717  | ENSG00000096968 | NM_001322194 |
| PGF     | 5228  | ENSG00000119630 | NM_001207012 |
| HAGH    | 3029  | ENSG00000063854 | NM_001040427 |
| PTPN11  | 5781  | ENSG00000179295 | NM_001330437 |
| ADAM17  | 6868  | ENSG00000151694 | NM_001382777 |
| MMP9    | 4318  | ENSG00000100985 | NM_004994    |
| ESR2    | 2100  | ENSG00000140009 | NM_001040275 |
| C8G     | 733   | ENSG00000176919 | NM_000606    |
| GNPDA1  | 10007 | ENSG00000113552 | NM_005471    |
| PDK2    | 5164  | ENSG00000005882 | NM_001199898 |
| ARF4    | 378   | ENSG00000168374 | NM_001660    |
| JAK3    | 3718  | ENSG00000105639 | NM_000215    |
| NR3C1   | 2908  | ENSG00000113580 | NM_000176    |
| FABP5   | 2171  | ENSG00000164687 | NM_001444    |
| CTSS    | 1520  | ENSG00000163131 | NM_001199739 |
| RHOA    | 387   | ENSG00000067560 | NM_001313941 |
| NOS2    | 4843  | ENSG00000007171 | NM_000625    |
| ZAP70   | 7535  | ENSG00000115085 | NM_001079    |
| FABP3   | 2170  | ENSG00000121769 | NM_001320996 |
| MMP2    | 4313  | ENSG00000087245 | NM_001127891 |
| MAPK12  | 6300  | ENSG00000188130 | NM_001303252 |
| MMP1    | 4312  | ENSG00000196611 | NM_001145938 |
| FABP6   | 2172  | ENSG00000170231 | NM_001040442 |
| LGALS3  | 3958  | ENSG00000131981 | NM_001177388 |
| FECH    | 2235  | ENSG00000066926 | NM_000140    |
| FDPS    | 2224  | ENSG00000160752 | NM_001135821 |
| PTK2    | 5747  | ENSG00000169398 | NM_001199649 |
| ARHGAP1 | 392   | ENSG00000175220 | NM_004308    |
| IL2     | 3558  | ENSG00000109471 | NM_000586    |
| RAF1    | 5894  | ENSG00000132155 | NM_001354689 |
| SETD7   | 80854 | ENSG00000145391 | NM_001306199 |
| CCL5    | 6352  | ENSG00000271503 | NM_001278736 |
| CCL5    | 6352  | ENSG00000274233 | NM_001278736 |
| CDC42   | 998   | ENSG00000070831 | NM_001039802 |
| HINT1   | 3094  | ENSG00000169567 | NM_005340    |
| TEK     | 7010  | ENSG00000120156 | NM_000459    |
| GSTM1   | 2944  | ENSG00000134184 | NM_000561    |
| MME     | 4311  | ENSG00000196549 | NM_000902    |
| NR1I3   | 9970  | ENSG00000143257 | NM_001077469 |
| RAB5A   | 5868  | ENSG00000144566 | NM_001292048 |
| PRKCQ   | 5588  | ENSG00000065675 | NM_001242413 |
| LYZ     | 4069  | ENSG00000090382 | NM_000239    |
| PADI4   | 23569 | ENSG00000159339 | NM_012387    |
| PADI4   | 23569 | ENSG00000280908 | NM_012387    |

|         |       |                 |              |
|---------|-------|-----------------|--------------|
| ELANE   | 1991  | ENSG00000197561 | NM_001972    |
| ELANE   | 1991  | ENSG00000277571 | NM_001972    |
| SULT2B1 | 6820  | ENSG00000088002 | NM_004605    |
| GP1BA   | 2811  | ENSG00000185245 | NM_000173    |
| GART    | 2618  | ENSG00000159131 | NM_000819    |
| GART    | 2618  | ENSG00000262473 | NM_000819    |
| HEXB    | 3074  | ENSG00000049860 | NM_000521    |
| CTNNA1  | 1495  | ENSG00000044115 | NM_001290307 |
| TPH1    | 7166  | ENSG00000129167 | NM_004179    |
| PPARA   | 5465  | ENSG00000186951 | NM_001001928 |
| MDM2    | 4193  | ENSG00000135679 | NM_001145336 |
| SELE    | 6401  | ENSG00000007908 | NM_000450    |
| SRM     | 6723  | ENSG00000116649 | NM_003132    |
| NMNAT1  | 64802 | ENSG00000173614 | NM_001297778 |
| EPHX2   | 2053  | ENSG00000120915 | NM_001256482 |
| BIRC7   | 79444 | ENSG00000101197 | NM_022161    |
| NR1H4   | 9971  | ENSG00000012504 | NM_001206977 |
| GSTA3   | 2940  | ENSG00000174156 | NM_000847    |
| S100A9  | 6280  | ENSG00000163220 | NM_002965    |
| ACAT1   | 38    | ENSG00000075239 | NM_000019    |
| GCDH    | 2639  | ENSG00000105607 | NM_000159    |
| CSK     | 1445  | ENSG00000103653 | NM_001127190 |
| BHMT    | 635   | ENSG00000145692 | NM_001713    |
| AGXT    | 189   | ENSG00000172482 | NM_000030    |
| KAT2B   | 8850  | ENSG00000114166 | NM_003884    |
| HRAS    | 3265  | ENSG00000174775 | NM_001130442 |
| HRAS    | 3265  | ENSG00000276536 | NM_001130442 |

---



Supplement Table 2. The possible targets of chondrosarcoma.

| SYMBOL   | ENTREZID  | ENSEMBL         | REFSEQ       |
|----------|-----------|-----------------|--------------|
| EXT1     | 2131      | ENSG00000182197 | NM_000127    |
| NR4A3    | 8013      | ENSG00000119508 | NM_006981    |
| TAF15    | 8148      | ENSG00000270647 | NM_003487    |
| TAF15    | 8148      | ENSG00000276833 | NM_003487    |
| EWSR1    | 2130      | ENSG00000182944 | NM_001163285 |
| TFG      | 10342     | ENSG00000114354 | NM_001007565 |
| CSAG1    | 158511    | ENSG00000198930 | NM_001102576 |
| EXT2     | 2132      | ENSG00000151348 | NM_000401    |
| TCF12    | 6938      | ENSG00000140262 | NM_001306219 |
| IDH1     | 3417      | ENSG00000138413 | NM_001282386 |
| IDH2     | 3418      | ENSG00000182054 | NM_001289910 |
| NCOA2    | 10499     | ENSG00000140396 | NM_001321703 |
| MMP13    | 4322      | ENSG00000137745 | NM_002427    |
| MUC1     | 4582      | ENSG00000185499 | NM_001018016 |
| CSAG2    | 102723547 | ENSG00000268902 | XM_006724857 |
| PTH1R    | 5745      | ENSG00000160801 | NM_000316    |
| SOX9     | 6662      | ENSG00000125398 | NM_000346    |
| MMP1     | 4312      | ENSG00000196611 | NM_001145938 |
| SYP      | 6855      | ENSG00000102003 | NM_003179    |
| S100B    | 6285      | ENSG00000160307 | NM_006272    |
| ENO2     | 2026      | ENSG00000111674 | NM_001975    |
| RUNX2    | 860       | ENSG00000124813 | NM_001015051 |
| VIM      | 7431      | ENSG00000026025 | NM_003380    |
| CNMD     | 11061     | ENSG00000136110 | NM_001011705 |
| SMARCB1  | 6598      | ENSG00000099956 | NM_001007468 |
| SMARCB1  | 6598      | ENSG00000275837 | NM_001007468 |
| MTAP     | 4507      | ENSG00000099810 | NM_002451    |
| PTHLH    | 5744      | ENSG00000087494 | NM_002820    |
| CDK4     | 1019      | ENSG00000135446 | NM_000075    |
| SPARC    | 6678      | ENSG00000113140 | NM_001309443 |
| S100A1   | 6271      | ENSG00000160678 | NM_006271    |
| FGF2     | 2247      | ENSG00000138685 | NM_001361665 |
| PDGFRA   | 5156      | ENSG00000134853 | NM_001347827 |
| PLAU     | 5328      | ENSG00000122861 | NM_001145031 |
| BMP2     | 650       | ENSG00000125845 | NM_001200    |
| MET      | 4233      | ENSG00000105976 | NM_000245    |
| MMP3     | 4314      | ENSG00000149968 | NM_002422    |
| MDM2     | 4193      | ENSG00000135679 | NM_001145336 |
| MYOG     | 4656      | ENSG00000122180 | NM_002479    |
| GFAP     | 2670      | ENSG00000131095 | NM_001131019 |
| SERPINA3 | 12        | ENSG00000196136 | NM_001085    |

|         |           |                 |              |
|---------|-----------|-----------------|--------------|
| BCAR4   | 400500    | ENSG00000262117 | NR_024049    |
| CCN2    | 1490      | ENSG00000118523 | NM_001901    |
| COL10A1 | 1300      | ENSG00000123500 | NM_000493    |
| FGFR3   | 2261      | ENSG00000068078 | NM_000142    |
| ADAMTS4 | 9507      | ENSG00000158859 | NM_001320336 |
| FUS     | 2521      | ENSG00000089280 | NM_001010850 |
| NFATC2  | 4773      | ENSG00000101096 | NM_001136021 |
| COL11A2 | 1302      | ENSG00000204248 | NM_001163771 |
| COL11A2 | 1302      | ENSG00000223699 | NM_001163771 |
| COL11A2 | 1302      | ENSG00000232541 | NM_001163771 |
| COL11A2 | 1302      | ENSG00000235708 | NM_001163771 |
| COL11A2 | 1302      | ENSG00000230930 | NM_001163771 |
| COL11A2 | 1302      | ENSG00000206290 | NM_001163771 |
| COL11A2 | 1302      | ENSG00000227801 | NM_001163771 |
| HEY1    | 23462     | ENSG00000164683 | NM_001040708 |
| DES     | 1674      | ENSG00000175084 | NM_001382708 |
| KIT     | 3815      | ENSG00000157404 | NM_000222    |
| ETV4    | 2118      | ENSG00000175832 | NM_001079675 |
| SS18    | 6760      | ENSG00000141380 | NM_001007559 |
| PLAG1   | 5324      | ENSG00000181690 | NM_001114634 |
| ETV1    | 2115      | ENSG00000006468 | NM_001163147 |
| PATZ1   | 23598     | ENSG00000100105 | NM_014323    |
| ZNF444  | 55311     | ENSG00000167685 | NM_001253792 |
| DUX4    | 100288687 | ENSG00000260596 | NM_001205218 |
| DUX4    | 100288687 | ENSG00000283949 | NM_001205218 |
| DUX4L7  | 653543    | ENSG00000281652 | NM_001127387 |
| DUX4L8  | 26583     | ENSG00000281720 | NM_012147    |
| DUX4L1  | 22947     | ENSG00000280757 | NM_033178    |
| CD99    | 4267      | ENSG00000002586 | NM_001122898 |
| COL2A1  | 1280      | ENSG00000139219 | NM_001844    |
| DDIT3   | 1649      | ENSG00000175197 | NM_001195053 |
| MAPT    | 4137      | ENSG00000186868 | NM_001123066 |
| MAPT    | 4137      | ENSG00000276155 | NM_001123066 |
| MAPT    | 4137      | ENSG00000277956 | NM_001123066 |
| VEGFA   | 7422      | ENSG00000112715 | NM_001025366 |
| NKX2-2  | 4821      | ENSG00000125820 | NM_002509    |
| CDKN2A  | 1029      | ENSG00000147889 | NM_000077    |
| CDKN2B  | 1030      | ENSG00000147883 | NM_004936    |
| MMP2    | 4313      | ENSG00000087245 | NM_001127891 |
| TLE1    | 7088      | ENSG00000196781 | NM_001303103 |
| SSX1    | 6756      | ENSG00000126752 | NM_001278691 |
| NKX3-1  | 4824      | ENSG00000167034 | NM_001256339 |
| IK      | 3550      | ENSG00000113141 | NM_006083    |
| WT1     | 7490      | ENSG00000184937 | NM_000378    |

|         |        |                 |              |
|---------|--------|-----------------|--------------|
| PBX1    | 5087   | ENSG00000185630 | NM_001204961 |
| NR4A1   | 3164   | ENSG00000123358 | NM_001202233 |
| CD34    | 947    | ENSG00000174059 | NM_001025109 |
| PBX3    | 5090   | ENSG00000167081 | NM_001134778 |
| CREB3L2 | 64764  | ENSG00000182158 | NM_001253775 |
| CCNB3   | 85417  | ENSG00000147082 | NM_033031    |
| SSX2    | 6757   | ENSG00000241476 | NM_001278697 |
| PCDHA8  | 56140  | ENSG00000204962 | NM_018911    |
| ZMAT2   | 153527 | ENSG00000146007 | NM_144723    |
| MAPK1   | 5594   | ENSG00000100030 | NM_002745    |
| MYOD1   | 4654   | ENSG00000129152 | NM_002478    |
| VEGFC   | 7424   | ENSG00000150630 | NM_005429    |
| H3-3A   | 3020   | ENSG00000163041 | NM_001379043 |
| PRKCA   | 5578   | ENSG00000154229 | NM_002737    |
| KRT7    | 3855   | ENSG00000135480 | NM_005556    |
| CD68    | 968    | ENSG00000129226 | NM_001040059 |
| CDX1    | 1044   | ENSG00000113722 | NM_001804    |
| IRF2BP2 | 359948 | ENSG00000168264 | NM_001077397 |
| COMP    | 1311   | ENSG00000105664 | NM_000095    |
| MMP9    | 4318   | ENSG00000100985 | NM_004994    |
| YEATS2  | 55689  | ENSG00000163872 | NM_001351369 |
| IDH3G   | 3421   | ENSG00000067829 | NM_004135    |
| H3-3B   | 3021   | ENSG00000132475 | NM_005324    |
| CSAG3   | 389903 | ENSG00000268916 | NM_001129826 |
| CLCN3   | 1182   | ENSG00000109572 | NM_001243372 |
| ITGAV   | 3685   | ENSG00000138448 | NM_001144999 |
| ITGB3   | 3690   | ENSG00000259207 | NM_000212    |
| PLGLB1  | 5343   | ENSG00000183281 | NM_001032392 |
| BCL2L1  | 598    | ENSG00000171552 | NM_001191    |
| TP53    | 7157   | ENSG00000141510 | NM_000546    |
| PTK2    | 5747   | ENSG00000169398 | NM_001199649 |
| CDKN1A  | 1026   | ENSG00000124762 | NM_000389    |
| H2AC18  | 8337   | ENSG00000203812 | NM_003516    |
| IL1B    | 3553   | ENSG00000125538 | NM_000576    |
| AREG    | 374    | ENSG00000109321 | NM_001657    |
| ITGB1   | 3688   | ENSG00000150093 | NM_002211    |
| IHH     | 3549   | ENSG00000163501 | NM_002181    |
| CEACAM3 | 1084   | ENSG00000170956 | NM_001277163 |
| BCL2    | 596    | ENSG00000171791 | NM_000633    |
| CXCR4   | 7852   | ENSG00000121966 | NM_001008540 |
| NFKB1   | 4790   | ENSG00000109320 | NM_001165412 |
| STAT3   | 6774   | ENSG00000168610 | NM_001369512 |
| HIF1A   | 3091   | ENSG00000100644 | NM_001243084 |
| BDNF    | 627    | ENSG00000176697 | NM_001143805 |

|           |           |                 |              |
|-----------|-----------|-----------------|--------------|
| ETF1      | 2107      | ENSG00000120705 | NM_001256302 |
| SEC31A    | 22872     | ENSG00000138674 | NM_001077206 |
| VPS72     | 6944      | ENSG00000163159 | NM_001271087 |
| MIR204    | 406987    | ENSG00000207935 | NR_029621    |
| EGFR      | 1956      | ENSG00000146648 | NM_001346897 |
| MIR145    | 406937    | ENSG00000276365 | NR_029686    |
| IL6       | 3569      | ENSG00000136244 | NM_000600    |
| TET2      | 54790     | ENSG00000168769 | NM_001127208 |
| PPARG     | 5468      | ENSG00000132170 | NM_001330615 |
| RB1       | 5925      | ENSG00000139687 | NM_000321    |
| TIMP2     | 7077      | ENSG00000035862 | NM_003255    |
| MIR30A    | 407029    | ENSG00000207827 | NR_029504    |
| XIAP      | 331       | ENSG00000101966 | NM_001167    |
| PTGS2     | 5743      | ENSG00000073756 | NM_000963    |
| MMP14     | 4323      | ENSG00000157227 | NM_004995    |
| TNFSF11   | 8600      | ENSG00000120659 | NM_003701    |
| CSAG4     | 100130935 | ENSG00000242599 | NM_001025306 |
| TNFRSF11A | 8792      | ENSG00000141655 | NM_001270949 |
| NAB2      | 4665      | ENSG00000166886 | NM_001330305 |
| PPCS      | 79717     | ENSG00000127125 | NM_001077447 |
| METTTL14  | 57721     | ENSG00000145388 | NM_020961    |
| AMER1     | 139285    | ENSG00000184675 | NM_152424    |
| YTHDC1    | 91746     | ENSG00000083896 | NM_001031732 |
| YTHDC1    | 91746     | ENSG00000275272 | NM_001031732 |
| ALKBH5    | 54890     | ENSG00000091542 | NM_017758    |
| RAB6C     | 84084     | ENSG00000222014 | NM_032144    |
| H3C4      | 8351      | ENSG00000197409 | NM_001376937 |
| H3C3      | 8352      | ENSG00000287080 | NM_003531    |
| H3C6      | 8353      | ENSG00000274750 | NM_001381999 |
| RETN      | 56729     | ENSG00000104918 | NM_001193374 |
| TERT      | 7015      | ENSG00000164362 | NM_001193376 |
| TGFB1     | 7040      | ENSG00000105329 | NM_000660    |
| CXCL12    | 6387      | ENSG00000107562 | NM_000609    |
| ADAMTS16  | 170690    | ENSG00000145536 | NM_139056    |
| PDCD5     | 9141      | ENSG00000105185 | NM_004708    |
| TBXT      | 6862      | ENSG00000164458 | NM_001270484 |
| NAMPT     | 10135     | ENSG00000105835 | NM_005746    |
| BAX       | 581       | ENSG00000087088 | NM_001291428 |
| SIX3      | 6496      | ENSG00000138083 | NM_005413    |
| ADAMTS9   | 56999     | ENSG00000163638 | NM_001318781 |
| MAPK3     | 5595      | ENSG00000102882 | NM_001040056 |
| KDM4C     | 23081     | ENSG00000107077 | NM_001146694 |
| TNF       | 7124      | ENSG00000232810 | NM_000594    |
| TNF       | 7124      | ENSG00000228978 | NM_000594    |

|         |        |                 |              |
|---------|--------|-----------------|--------------|
| TNF     | 7124   | ENSG00000230108 | NM_000594    |
| TNF     | 7124   | ENSG00000223952 | NM_000594    |
| TNF     | 7124   | ENSG00000228321 | NM_000594    |
| TNF     | 7124   | ENSG00000228849 | NM_000594    |
| TNF     | 7124   | ENSG00000204490 | NM_000594    |
| TNF     | 7124   | ENSG00000206439 | NM_000594    |
| TNC     | 3371   | ENSG00000041982 | NM_002160    |
| IFI27   | 3429   | ENSG00000165949 | NM_001130080 |
| IFI27   | 3429   | ENSG00000275214 | NM_001130080 |
| CASP3   | 836    | ENSG00000164305 | NM_001354777 |
| IGF1    | 3479   | ENSG00000017427 | NM_000618    |
| TGFB2   | 7042   | ENSG00000092969 | NM_001135599 |
| CD274   | 29126  | ENSG00000120217 | NM_001267706 |
| PDPN    | 10630  | ENSG00000162493 | NM_001006624 |
| EZR     | 7430   | ENSG00000092820 | NM_001111077 |
| PIK3CG  | 5294   | ENSG00000105851 | NM_001282426 |
| ITGA8   | 8516   | ENSG00000077943 | NM_001291494 |
| VNN2    | 8875   | ENSG00000112303 | NM_001242350 |
| MCHR2   | 84539  | ENSG00000152034 | NM_001040179 |
| MAML1   | 9794   | ENSG00000161021 | NM_014757    |
| MAML1   | 9794   | ENSG00000283780 | NM_014757    |
| ADHFE1  | 137872 | ENSG00000147576 | NM_144650    |
| FBXW5   | 54461  | ENSG00000159069 | NM_018998    |
| OGFOD1  | 55239  | ENSG00000087263 | NM_001324357 |
| JMJD4   | 65094  | ENSG00000081692 | NM_001161465 |
| PLGLB2  | 5342   | ENSG00000125551 | NM_002665    |
| ZNF80   | 7634   | ENSG00000174255 | NM_007136    |
| MIR33B  | 693120 | ENSG00000207839 | NR_030361    |
| ACTC1   | 70     | ENSG00000159251 | NM_005159    |
| GNAS    | 2778   | ENSG00000087460 | NM_000516    |
| ATRX    | 546    | ENSG00000085224 | NM_000489    |
| CEP57   | 9702   | ENSG00000166037 | NM_001243776 |
| GPR108  | 56927  | ENSG00000125734 | NM_001080452 |
| CCDC26  | 137196 | ENSG00000229140 | NR_130917    |
| NFKBIA  | 4792   | ENSG00000100906 | NM_020529    |
| ENG     | 2022   | ENSG00000106991 | NM_000118    |
| MTOR    | 2475   | ENSG00000198793 | NM_001386500 |
| ACAN    | 176    | ENSG00000157766 | NM_001135    |
| CCND1   | 595    | ENSG00000110092 | NM_053056    |
| MIR491  | 574444 | ENSG00000207609 | NR_030166    |
| SP1     | 6667   | ENSG00000185591 | NM_001251825 |
| EPAS1   | 2034   | ENSG00000116016 | NM_001430    |
| SIRT1   | 23411  | ENSG00000096717 | NM_001142498 |
| ADIPOR1 | 51094  | ENSG00000159346 | NM_001290553 |

|          |        |                 |              |
|----------|--------|-----------------|--------------|
| ADIPOR2  | 79602  | ENSG00000006831 | NM_001375363 |
| ADIPOR2  | 79602  | ENSG00000285070 | NM_001375363 |
| MIR181A1 | 406995 | ENSG00000207759 | NR_029626    |
| NFATC1   | 4772   | ENSG00000131196 | NM_001278669 |
| HDAC4    | 9759   | ENSG00000068024 | NM_001378414 |
| SDC2     | 6383   | ENSG00000169439 | NM_002998    |
| MYC      | 4609   | ENSG00000136997 | NM_001354870 |
| MIR199A1 | 406976 | ENSG00000207752 | NR_029586    |
| FGFR1    | 2260   | ENSG00000077782 | NM_001174063 |
| ESRRB    | 2103   | ENSG00000119715 | NM_001379180 |
| HSPA5    | 3309   | ENSG00000044574 | NM_005347    |
| CXCL8    | 3576   | ENSG00000169429 | NM_000584    |
| MMP7     | 4316   | ENSG00000137673 | NM_002423    |
| CCL2     | 6347   | ENSG00000108691 | NM_002982    |
| RAF1     | 5894   | ENSG00000132155 | NM_001354689 |
| ITGB5    | 3693   | ENSG00000082781 | NM_001354764 |
| HNF1A    | 6927   | ENSG00000135100 | NM_000545    |
| E2F1     | 1869   | ENSG00000101412 | NM_005225    |
| CCL5     | 6352   | ENSG00000271503 | NM_001278736 |
| CCL5     | 6352   | ENSG00000274233 | NM_001278736 |
| PEG10    | 23089  | ENSG00000242265 | NM_001040152 |
| MIR27B   | 407019 | ENSG00000207864 | NR_029665    |
| CEBPB    | 1051   | ENSG00000172216 | NM_001285878 |
| MIR143   | 406935 | ENSG00000284182 | NR_029684    |
| PDGFRB   | 5159   | ENSG00000113721 | NM_001355016 |
| SRC      | 6714   | ENSG00000197122 | NM_005417    |
| DKK1     | 22943  | ENSG00000107984 | NM_012242    |
| CCN3     | 4856   | ENSG00000136999 | NM_002514    |
| CD44     | 960    | ENSG00000026508 | NM_000610    |
| ICAM1    | 3383   | ENSG00000090339 | NM_000201    |
| PRKAA1   | 5562   | ENSG00000132356 | NM_001355028 |
| LEP      | 3952   | ENSG00000174697 | NM_000230    |
| HSPG2    | 3339   | ENSG00000142798 | NM_001291860 |
| ISG20    | 3669   | ENSG00000172183 | NM_001303233 |
| CCN6     | 8838   | ENSG00000112761 | NM_003880    |
| IKBKB    | 3551   | ENSG00000104365 | NM_001190720 |
| BDKRB1   | 623    | ENSG00000100739 | NM_000710    |
| CTSB     | 1508   | ENSG00000164733 | NM_001317237 |
| CTSB     | 1508   | ENSG00000285132 | NM_001317237 |
| ITGA6    | 3655   | ENSG00000091409 | NM_000210    |
| RELA     | 5970   | ENSG00000173039 | NM_001145138 |
| ITGA5    | 3678   | ENSG00000161638 | NM_002205    |
| ITGA2    | 3673   | ENSG00000164171 | NM_002203    |
| ADAMTS1  | 9510   | ENSG00000154734 | NM_006988    |

|         |        |                 |              |
|---------|--------|-----------------|--------------|
| RUNX3   | 864    | ENSG0000020633  | NM_001031680 |
| IL11    | 3589   | ENSG0000095752  | NM_000641    |
| PRKCD   | 5580   | ENSG00000163932 | NM_001316327 |
| ABL1    | 25     | ENSG0000097007  | NM_005157    |
| MAPK14  | 1432   | ENSG00000112062 | NM_001315    |
| PARP1   | 142    | ENSG00000143799 | NM_001618    |
| EDN1    | 1906   | ENSG0000078401  | NM_001168319 |
| IGF2    | 3481   | ENSG00000167244 | NM_000612    |
| EFNA5   | 1946   | ENSG00000184349 | NM_001962    |
| TIMP3   | 7078   | ENSG00000100234 | NM_000362    |
| MAPK10  | 5602   | ENSG00000109339 | NM_001318067 |
| MTHFR   | 4524   | ENSG00000177000 | NM_001330358 |
| JUN     | 3725   | ENSG00000177606 | NM_002228    |
| ETV6    | 2120   | ENSG00000139083 | NM_001987    |
| GLI1    | 2735   | ENSG00000111087 | NM_001160045 |
| ZBTB7A  | 51341  | ENSG00000178951 | NM_001317990 |
| PDGFB   | 5155   | ENSG00000100311 | NM_002608    |
| CHGA    | 1113   | ENSG00000100604 | NM_001275    |
| CHGA    | 1113   | ENSG00000276781 | NM_001275    |
| PARVA   | 55742  | ENSG00000197702 | NM_018222    |
| MMP12   | 4321   | ENSG00000262406 | NM_002426    |
| ADAMTS5 | 11096  | ENSG00000154736 | NM_007038    |
| IL1A    | 3552   | ENSG00000115008 | NM_000575    |
| LGALS1  | 3956   | ENSG00000100097 | NM_002305    |
| CYCS    | 54205  | ENSG00000172115 | NM_018947    |
| PLAGL1  | 5325   | ENSG00000118495 | NM_001080951 |
| FH      | 2271   | ENSG00000091483 | NM_000143    |
| IDH3B   | 3420   | ENSG00000101365 | NM_001258384 |
| D2HGDH  | 728294 | ENSG00000180902 | NM_001287249 |
| AGGF1   | 55109  | ENSG00000164252 | NM_018046    |
| L2HGDH  | 79944  | ENSG00000087299 | NM_024884    |
| PDCD1   | 5133   | ENSG00000188389 | NM_005018    |
| PDCD1   | 5133   | ENSG00000276977 | NM_005018    |
| ESR2    | 2100   | ENSG00000140009 | NM_001040275 |
| CDH1    | 999    | ENSG00000039068 | NM_001317184 |
| MIR381  | 494330 | ENSG00000199020 | NR_029873    |
| FOS     | 2353   | ENSG00000170345 | NM_005252    |
| TGFBR1  | 7046   | ENSG00000106799 | NM_001130916 |
| SATB2   | 23314  | ENSG00000119042 | NM_001172509 |
| BAG3    | 9531   | ENSG00000151929 | NM_004281    |
| MMP19   | 4327   | ENSG00000123342 | NM_001032360 |
| INSM1   | 3642   | ENSG00000173404 | NM_002196    |
| TGFBR2  | 7048   | ENSG00000163513 | NM_001024847 |
| TP63    | 8626   | ENSG00000073282 | NM_001114978 |

|          |        |                 |              |
|----------|--------|-----------------|--------------|
| TGFB3    | 7043   | ENSG00000119699 | NM_001329938 |
| NCAM1    | 4684   | ENSG00000149294 | NM_000615    |
| BMP2R2   | 659    | ENSG00000204217 | NM_001204    |
| JUP      | 3728   | ENSG00000173801 | NM_001352773 |
| HSPA1A   | 3303   | ENSG00000204389 | NM_005345    |
| HSPA1A   | 3303   | ENSG00000235941 | NM_005345    |
| HSPA1A   | 3303   | ENSG00000234475 | NM_005345    |
| HSPA1A   | 3303   | ENSG00000215328 | NM_005345    |
| HSPA1A   | 3303   | ENSG00000237724 | NM_005345    |
| CSPG4    | 1464   | ENSG00000173546 | NM_001897    |
| MKI67    | 4288   | ENSG00000148773 | NM_001145966 |
| ID1      | 3397   | ENSG00000125968 | NM_002165    |
| MIR206   | 406989 | ENSG00000207604 | NR_029713    |
| AURKA    | 6790   | ENSG00000087586 | NM_001323303 |
| CTSK     | 1513   | ENSG00000143387 | NM_000396    |
| PRMT1    | 3276   | ENSG00000126457 | NM_001207042 |
| CCN4     | 8840   | ENSG00000104415 | NM_001204869 |
| LDHA     | 3939   | ENSG00000134333 | NM_001135239 |
| LDHA     | 3939   | ENSG00000288299 | NM_001135239 |
| AURKB    | 9212   | ENSG00000178999 | NM_001256834 |
| HDAC9    | 9734   | ENSG00000048052 | NM_001204144 |
| GADD45B  | 4616   | ENSG00000099860 | NM_015675    |
| MIR125B2 | 406912 | ENSG00000207863 | NR_029694    |
| MIR125B1 | 406911 | ENSG00000207971 | NR_029671    |
| MIR494   | 574452 | ENSG00000194717 | NR_030174    |
| TEC      | 7006   | ENSG00000135605 | NM_003215    |
| BGLAP    | 632    | ENSG00000242252 | NM_199173    |
| POMGNT2  | 84892  | ENSG00000144647 | NM_032806    |
| ABCB1    | 5243   | ENSG00000085563 | NM_000927    |
| CDC25A   | 993    | ENSG00000164045 | NM_001789    |
| YAP1     | 10413  | ENSG00000137693 | NM_001130145 |
| PRKAB1   | 5564   | ENSG00000111725 | NM_006253    |
| SOX4     | 6659   | ENSG00000124766 | NM_003107    |
| SMAD1    | 4086   | ENSG00000170365 | NM_001003688 |
| SFRP5    | 6425   | ENSG00000120057 | NM_003015    |
| PRAME    | 23532  | ENSG00000185686 | NM_001291715 |
| PRAME    | 23532  | ENSG00000275013 | NM_001291715 |
| CTAG2    | 30848  | ENSG00000126890 | NM_020994    |
| MIR497   | 574456 | ENSG00000284027 | NR_030178    |
| MMP8     | 4317   | ENSG00000118113 | NM_001304441 |
| MYCN     | 4613   | ENSG00000134323 | NM_001293228 |
| NOS2     | 4843   | ENSG00000007171 | NM_000625    |
| CTSL     | 1514   | ENSG00000135047 | NM_001257971 |
| BECN1    | 8678   | ENSG00000126581 | NM_001313998 |



|          |        |                 |              |
|----------|--------|-----------------|--------------|
| THY1     | 7070   | ENSG00000154096 | NM_001311160 |
| ADAM28   | 10863  | ENSG00000042980 | NM_001304351 |
| NAPRT    | 93100  | ENSG00000147813 | NM_001286829 |
| NAPRT    | 93100  | ENSG00000278488 | NM_001286829 |
| TOMM20   | 9804   | ENSG00000173726 | NM_014765    |
| MIR342   | 442909 | ENSG00000199082 | NR_029888    |
| MIR186   | 406962 | ENSG00000207721 | NR_029707    |
| BRAF     | 673    | ENSG00000157764 | NM_001354609 |
| HDAC6    | 10013  | ENSG00000094631 | NM_001321225 |
| CASP9    | 842    | ENSG00000132906 | NM_001229    |
| AMACR    | 23600  | ENSG00000242110 | NM_001167595 |
| CCR7     | 1236   | ENSG00000126353 | NM_001301714 |
| AGER     | 177    | ENSG00000204305 | NM_001136    |
| AGER     | 177    | ENSG00000231268 | NM_001136    |
| AGER     | 177    | ENSG00000229058 | NM_001136    |
| AGER     | 177    | ENSG00000237405 | NM_001136    |
| AGER     | 177    | ENSG00000230514 | NM_001136    |
| AGER     | 177    | ENSG00000206320 | NM_001136    |
| AGER     | 177    | ENSG00000234729 | NM_001136    |
| XRCC5    | 7520   | ENSG00000079246 | NM_021141    |
| SNAI2    | 6591   | ENSG00000019549 | NM_003068    |
| CCL21    | 6366   | ENSG00000137077 | NM_002989    |
| PTGER1   | 5731   | ENSG00000160951 | NM_000955    |
| TNFRSF8  | 943    | ENSG00000120949 | NM_001243    |
| RGS16    | 6004   | ENSG00000143333 | NM_002928    |
| MIR101-1 | 406893 | ENSG00000199135 | NR_029516    |
| CD36     | 948    | ENSG00000135218 | NM_000072    |
| FGF1     | 2246   | ENSG00000113578 | NM_000800    |
| TIMP1    | 7076   | ENSG00000102265 | NM_003254    |
| HGF      | 3082   | ENSG00000019991 | NM_000601    |
| SERPINE1 | 5054   | ENSG00000106366 | NM_000602    |
| EIF2AK3  | 9451   | ENSG00000172071 | NM_001313915 |
| PLAT     | 5327   | ENSG00000104368 | NM_000930    |
| FLI1     | 2313   | ENSG00000151702 | NM_001167681 |
| MAP3K5   | 4217   | ENSG00000197442 | NM_005923    |
| SETD2    | 29072  | ENSG00000181555 | NM_001349370 |
| MYH11    | 4629   | ENSG00000133392 | NM_001040113 |
| MYH11    | 4629   | ENSG00000276480 | NM_001040113 |
| NCOA3    | 8202   | ENSG00000124151 | NM_001174087 |
| ADIPOQ   | 9370   | ENSG00000181092 | NM_001177800 |
| KRT19    | 3880   | ENSG00000171345 | NM_002276    |
| THBS1    | 7057   | ENSG00000137801 | NM_003246    |
| NCOA1    | 8648   | ENSG00000084676 | NM_001362950 |
| POSTN    | 10631  | ENSG00000133110 | NM_001135934 |

|          |        |                 |              |
|----------|--------|-----------------|--------------|
| MCM6     | 4175   | ENSG00000076003 | NM_005915    |
| IGF2BP3  | 10643  | ENSG00000136231 | NM_006547    |
| ATG12    | 9140   | ENSG00000145782 | NM_001277783 |
| MAGEA3   | 4102   | ENSG00000221867 | NM_005362    |
| MIR100   | 406892 | ENSG00000207994 | NR_029515    |
| MIR200B  | 406984 | ENSG00000207730 | NR_029639    |
| MIR199A2 | 406977 | ENSG00000208024 | NR_029618    |
| MIR129-2 | 406918 | ENSG00000199077 | NR_029697    |
| MIR454   | 768216 | ENSG00000211514 | NR_030411    |
| MIR129-1 | 406917 | ENSG00000207705 | NR_029596    |
| MIR519D  | 574480 | ENSG00000207981 | NR_030202    |
| PTPN11   | 5781   | ENSG00000179295 | NM_001330437 |
| HSP90AA1 | 3320   | ENSG00000080824 | NM_001017963 |
| ACP5     | 54     | ENSG00000102575 | NM_001111034 |
| PTH      | 5741   | ENSG00000152266 | NM_000315    |
| TDP1     | 55775  | ENSG00000042088 | NM_001008744 |
| GSTA3    | 2940   | ENSG00000174156 | NM_000847    |
| UBE2R2   | 54926  | ENSG00000107341 | NM_017811    |
| PTGR1    | 22949  | ENSG00000106853 | NM_001146108 |
| MAML3    | 55534  | ENSG00000196782 | NM_018717    |
| RCN3     | 57333  | ENSG00000142552 | NM_020650    |
| IL10     | 3586   | ENSG00000136634 | NM_000572    |
| BMP6     | 654    | ENSG00000153162 | NM_001718    |
| CAPN1    | 823    | ENSG00000014216 | NM_001198868 |
| DAPK1    | 1612   | ENSG00000196730 | NM_001288729 |
| CAPN2    | 824    | ENSG00000162909 | NM_001146068 |
| CD40LG   | 959    | ENSG00000102245 | NM_000074    |
| HSPD1    | 3329   | ENSG00000144381 | NM_002156    |
| CRP      | 1401   | ENSG00000132693 | NM_000567    |
| VEGFB    | 7423   | ENSG00000173511 | NM_001243733 |
| KLF6     | 1316   | ENSG00000067082 | NM_001008490 |
| FHIT     | 2272   | ENSG00000189283 | NM_001166243 |
| RPS6     | 6194   | ENSG00000137154 | NM_001010    |
| MUC5B    | 727897 | ENSG00000117983 | NM_002458    |
| PPFIBP1  | 8496   | ENSG00000110841 | NM_001198915 |
| CCL3     | 6348   | ENSG00000277632 | NM_002983    |
| CCL3     | 6348   | ENSG00000278567 | NM_002983    |
| CCL3     | 6348   | ENSG00000274221 | NM_002983    |
| ETV5     | 2119   | ENSG00000244405 | NM_004454    |
| VEGFD    | 2277   | ENSG00000165197 | NM_004469    |
| CCN1     | 3491   | ENSG00000142871 | NM_001554    |
| SNHG6    | 641638 | ENSG00000245910 | NR_002599    |
| MIR624   | 693209 | ENSG00000207952 | NR_030354    |
| CDK2     | 1017   | ENSG00000123374 | NM_001290230 |

|           |       |                 |              |
|-----------|-------|-----------------|--------------|
| CHUK      | 1147  | ENSG00000213341 | NM_001278    |
| MIF       | 4282  | ENSG00000240972 | NM_002415    |
| MIF       | 4282  | ENSG00000276701 | NM_002415    |
| IRS1      | 3667  | ENSG00000169047 | NM_005544    |
| GATA1     | 2623  | ENSG00000102145 | NM_002049    |
| CCNB1     | 891   | ENSG00000134057 | NM_001354844 |
| SPP1      | 6696  | ENSG00000118785 | NM_000582    |
| HSP90B1   | 7184  | ENSG00000166598 | NM_003299    |
| HMGB1     | 3146  | ENSG00000189403 | NM_001313892 |
| FSCN1     | 6624  | ENSG00000075618 | NM_003088    |
| SYNM      | 23336 | ENSG00000182253 | NM_015286    |
| CTSD      | 1509  | ENSG00000117984 | NM_001909    |
| HRAS      | 3265  | ENSG00000174775 | NM_001130442 |
| HRAS      | 3265  | ENSG00000276536 | NM_001130442 |
| COL1A2    | 1278  | ENSG00000164692 | NM_000089    |
| PIK3CB    | 5291  | ENSG00000051382 | NM_001256045 |
| TNFRSF11B | 4982  | ENSG00000164761 | NM_002546    |
| KNG1      | 3827  | ENSG00000113889 | NM_000893    |
| F2R       | 2149  | ENSG00000181104 | NM_001311313 |
| F2RL3     | 9002  | ENSG00000127533 | NM_003950    |
| BDKRB2    | 624   | ENSG00000168398 | NM_000623    |
| TBX3      | 6926  | ENSG00000135111 | NM_005996    |
| SERPINB2  | 5055  | ENSG00000197632 | NM_001143818 |
| PRPH      | 5630  | ENSG00000135406 | NM_006262    |
| HS3ST1    | 9957  | ENSG00000002587 | NM_005114    |
| APOBEC3B  | 9582  | ENSG00000179750 | NM_001270411 |
| HS3ST2    | 9956  | ENSG00000122254 | NM_006043    |
| IGF1R     | 3480  | ENSG00000140443 | NM_000875    |
| RET       | 5979  | ENSG00000165731 | NM_000323    |
| AKT1      | 207   | ENSG00000142208 | NM_001014431 |
| SMO       | 6608  | ENSG00000128602 | NM_005631    |
| MYB       | 4602  | ENSG00000118513 | NM_001130172 |
| PTCH1     | 5727  | ENSG00000185920 | NM_000264    |
| KDM1A     | 23028 | ENSG00000004487 | NM_001009999 |
| FGR       | 2268  | ENSG00000000938 | NM_001042729 |
| ILK       | 3611  | ENSG00000166333 | NM_001014794 |
| TGFA      | 7039  | ENSG00000163235 | NM_001099691 |
| GFM1      | 85476 | ENSG00000168827 | NM_001308164 |
| GAB1      | 2549  | ENSG00000109458 | NM_002039    |
| TIAM1     | 7074  | ENSG00000156299 | NM_001353684 |
| FGF3      | 2248  | ENSG00000186895 | NM_005247    |
| SPINT2    | 10653 | ENSG00000167642 | NM_001166103 |
| PDGFA     | 5154  | ENSG00000197461 | NM_002607    |
| LUM       | 4060  | ENSG00000139329 | NM_002345    |

|         |        |                 |              |
|---------|--------|-----------------|--------------|
| CDC37   | 11140  | ENSG00000105401 | NM_007065    |
| FERMT2  | 10979  | ENSG00000073712 | NM_001134999 |
| PARVB   | 29780  | ENSG00000188677 | NM_001003828 |
| FBLIM1  | 54751  | ENSG00000162458 | NM_001024215 |
| MIR518B | 574474 | ENSG00000207862 | NR_030196    |

---

Supplement Table 3. The potential targets associated with SA against chondrosarcoma.

| SYMBOL   | ENTREZID | ENSEMBL         | REFSEQ       |
|----------|----------|-----------------|--------------|
| CASP3    | 836      | ENSG00000164305 | NM_001354777 |
| BMP2     | 650      | ENSG00000125845 | NM_001200    |
| CDK2     | 1017     | ENSG00000123374 | NM_001290230 |
| MAPK10   | 5602     | ENSG00000109339 | NM_001318067 |
| CTSD     | 1509     | ENSG00000117984 | NM_001909    |
| TGFBR2   | 7048     | ENSG00000163513 | NM_001024847 |
| PLAU     | 5328     | ENSG00000122861 | NM_001145031 |
| IGF1R    | 3480     | ENSG00000140443 | NM_000875    |
| SRC      | 6714     | ENSG00000197122 | NM_005417    |
| MAPK1    | 5594     | ENSG00000100030 | NM_002745    |
| MMP8     | 4317     | ENSG00000118113 | NM_001304441 |
| MMP3     | 4314     | ENSG00000149968 | NM_002422    |
| MTAP     | 4507     | ENSG00000099810 | NM_002451    |
| MMP13    | 4322     | ENSG00000137745 | NM_002427    |
| EGFR     | 1956     | ENSG00000146648 | NM_001346897 |
| MAPK14   | 1432     | ENSG00000112062 | NM_001315    |
| CTSB     | 1508     | ENSG00000164733 | NM_001317237 |
| CTSB     | 1508     | ENSG00000285132 | NM_001317237 |
| HSP90AA1 | 3320     | ENSG00000080824 | NM_001017963 |
| TGFBR1   | 7046     | ENSG00000106799 | NM_001130916 |
| AKT1     | 207      | ENSG00000142208 | NM_001014431 |
| MMP12    | 4321     | ENSG00000262406 | NM_002426    |
| FGF1     | 2246     | ENSG00000113578 | NM_000800    |
| PARP1    | 142      | ENSG00000143799 | NM_001618    |
| CTSK     | 1513     | ENSG00000143387 | NM_000396    |
| FHIT     | 2272     | ENSG00000189283 | NM_001166243 |
| PPARG    | 5468     | ENSG00000132170 | NM_001330615 |
| MIF      | 4282     | ENSG00000240972 | NM_002415    |
| MIF      | 4282     | ENSG00000276701 | NM_002415    |
| DAPK1    | 1612     | ENSG00000196730 | NM_001288729 |
| ISG20    | 3669     | ENSG00000172183 | NM_001303233 |
| MMP7     | 4316     | ENSG00000137673 | NM_002423    |
| XIAP     | 331      | ENSG00000101966 | NM_001167    |
| MET      | 4233     | ENSG00000105976 | NM_000245    |
| FGFR1    | 2260     | ENSG00000077782 | NM_001174063 |
| PIK3CG   | 5294     | ENSG00000105851 | NM_001282426 |
| KIT      | 3815     | ENSG00000157404 | NM_000222    |
| PTPN11   | 5781     | ENSG00000179295 | NM_001330437 |
| MMP9     | 4318     | ENSG00000100985 | NM_004994    |
| ESR2     | 2100     | ENSG00000140009 | NM_001040275 |
| NOS2     | 4843     | ENSG00000007171 | NM_000625    |

|       |      |                 |              |
|-------|------|-----------------|--------------|
| MMP2  | 4313 | ENSG00000087245 | NM_001127891 |
| MMP1  | 4312 | ENSG00000196611 | NM_001145938 |
| PTK2  | 5747 | ENSG00000169398 | NM_001199649 |
| RAF1  | 5894 | ENSG00000132155 | NM_001354689 |
| CCL5  | 6352 | ENSG00000271503 | NM_001278736 |
| CCL5  | 6352 | ENSG00000274233 | NM_001278736 |
| MDM2  | 4193 | ENSG00000135679 | NM_001145336 |
| GSTA3 | 2940 | ENSG00000174156 | NM_000847    |
| HRAS  | 3265 | ENSG00000174775 | NM_001130442 |
| HRAS  | 3265 | ENSG00000276536 | NM_001130442 |

---
